# Supplementary material
Source: PubMed Central journal article supplement (PMC3746895)
Supplement: 1307228110_pnas.201307228SI.pdf [file 1307228110_pnas.201307228SI.pdf]

# Supporting Information

Zhang et al. 10.1073/pnas.1307228110

## SI Materials and Methods

**Construction, Expression, and Purification of Rhizavidin Fusion Antigens.** The gene sequence encoding the rhizavidin (rhavi) fragment (aa 45–179) was synthesized by Genscript (Piscataway, NJ), using an optimized *Escherichia coli* expression codon (seq1). The expression construct contains a secretion signal-coding region (seq2) on the 5' end of the rhavi gene and a flexible linker coding region (seq3) on the 3' end of the rhavi gene. For preparation of lipidated rhavi, a DNA sequence encoding a lipidation box in *E. coli* (seq4) was added on the 5' end of the rhavi gene. For fusion antigens, the DNA sequences encoding target proteins were amplified from the genomic DNA via PCR and then cloned to the 3' end of the linker region. Table S1 lists the protein antigens used in this study. All constructs were cloned into a pET-21b vector and transformed into *E. coli* strain BL21 (DE3) for expression. His-tagged recombinant proteins were purified using Ni-nitrilotriacetic acid (NTA) affinity chromatography. To improve purity, the eluents of the affinity column were then subjected to size-exclusion chromatography on a Superdex 200 column. The peak fractions containing the fusion proteins were collected, evaluated by SDS/PAGE, and then flash-frozen in liquid nitrogen for future use. Protein concentration was measured using a bicinchoninic acid (BCA) protein assay kit (Bio-Rad).

seq1: 5-TTTGATGCGAGTAACTTTAAAGATTTTCAGCTCT  
ATTGCGAGCGCCAGTAGCTCTTGGCAGAATCA  
GAGTGGCAGCACCATGATTATCCAGGTGGATT  
CTTTCGGCAACGTTAGTGGCCAGTATGTTAATC  
GTGCGCAGGGCACGGGTTGCCAGAACTCTCCG  
TACCCGCTGACCGGCCGCGTGAATGGCAGGTTT  
ATCGCCTTCAGCGTTGGCTGGAACAATTCTACC  
GAAAACGTGAATAGTGCAACCGGCTGGACGGG  
TTATGCGCAGGTGAACGGTAACAATACCGAAA  
TTGTTACGAGCTGGAATCTGGCCTATGAAGGCG  
GTTCTGGCCCGCAATCGAACAGGGTCAGGAT  
ACTTTTAGTACGTTCCGACCACGGAAAACAA  
AAGCCTGCTGAAAGAT-3

seq2: 5-ATGAAAAGATTTGGCTGGCGCTGGCTGGTTTA  
GTTTTAGCGTTTAGCGCATCGGCGGCGCAGGAT  
CCG-3

seq3: 5-GGAGGCGGAGGTTTCGAGCTCC-3

seq4: 5-ATGAAGAAAGTAGCCGCGTTTGTGCGCTAAG  
CCTGCTGATGGCGGGATGTGTATCG-3

**Biotinylation of Polysaccharides.** Biotinylation of polysaccharides (PSs) containing hydroxyl groups was done using 1-cyano-4-dimethylaminopyridinium tetrafluoroborate (CDAP) as an activation reagent. The PS was dissolved in LPS-free water (cell culture grade; HyClone) for a final concentration of 1–5 mg/mL. At time 0, a volume of CDAP (freshly made at a concentration of 100 mg/mL in acetonitrile) was added to a final ratio of 1 mg of CDAP per 1 mg of PS during vortexing. At 30 s, a volume of 0.2 M triethylamine (TEA; Sigma-Aldrich) was added to raise

the pH to 8. (For neutral PS, the volume of TEA is equal to the volume of CDAP; for acidic PS, the volume of TEA is doubled.) At 2.5 min, a volume of biotin derivative (Pierce EZ-Link Amine-PEG3-Biotin, 20 mg/mL in water) was added to a final ratio of 1 mg of biotin to 1 mg of PS followed by incubation at room temperature for 1–4 h. For more diluted samples (<1 mg/mL), overnight incubation was used. The reaction was terminated by adding 25 mM of glycine, and the excess biotin was removed by extensive dialysis against PBS.

For PSs that lack hydroxyls but contain carboxyl groups, such as Vi PS, activation was accomplished with 1-ethyl-3-[3-dimethylaminopropyl]carbodiimide hydrochloride (EDC, Pierce). The PS was dissolved in MES buffer (0.1 M, pH 5.8, 150 mM NaCl) for a final concentration of 5–10 mg/mL. A volume of biotin derivative was added to a final ratio of 2 mg of biotin to 1 mg of PS. A volume of EDC solution (freshly made at 100 mg/mL in MES buffer) was added to a ratio of 1 mg of EDC to 1 mg of PS. The mixture was incubated overnight at room temperature, after which the reaction was terminated by the addition of 25 mM glycine. Excess biotin and EDC were removed by dialysis against PBS.

The level of biotinylation was determined using a biotin quantification kit (Pierce). The concentrations of CPSs (except Vi) were determined by an anthrone assay (1). The concentration of Vi was measured as described previously (2).

**Antibody Measurement.** Serum antibody titer was measured by ELISA in 96-well plates (Immulon 2 HB) coated with target PS or protein antigens. Plates were blocked with PBS containing 1% BSA for 1 h at room temperature. Mouse or rabbit serum was diluted in PBS containing 0.005% Tween 20 (PBS-T), added to the plate, and incubated at room temperature for 2 h. For measurement of antibody against pneumococcal CPS, serum was diluted with PBS-T containing 5 µg/mL purified pneumococcal cell wall PS (CWPS). After a wash with PBS-T, a secondary HRP-conjugated antibody against mouse or rabbit IgG was added, followed by incubation at room temperature for 1 h. The plates were washed and then developed with SureBlue TMB Microwell Peroxidase Substrate (KPL). The reactions were terminated by the addition of 1 M HCl, and the  $A_{450}$  was analyzed using an ELISA reader. Antibody titers were expressed relative to a standard serum.

**In Vitro Stimulation of Whole Blood and Splenocytes.** In vitro stimulation of peripheral blood was performed in 96-well round-bottom plates. All stimulants were diluted in stimulation medium (DMEM F-12; 10% FBS, 50 µM 2-mercaptoethanol, 10 µg/mL ciprofloxacin) at final concentration of 10 µg/mL as described previously (3). In each well, 25 µL of heparinized blood was added to 225 µL of stimulation medium containing indicated stimulants, followed by incubation at 37 °C for 6 d. Supernatants were collected after centrifugation, and cytokine concentration was analyzed using IFN- $\gamma$  and IL-17A ELISA kits (R&D Systems).

Mouse splenocytes were isolated as described previously (3). Isolated splenocytes were resuspended in stimulation medium and seeded into 48-well plates at  $3 \times 10^6$  cells/well in a volume of 300 µL for incubation at 37 °C for 2 h. Stimulants were added at the indicated concentration, and the cells were incubated at 37 °C for 3 d, followed by collection of supernatants for cytokine measurements. Depletion of specific T-cell subsets in splenocytes was done using CD4<sup>+</sup> or CD8a<sup>+</sup> microbeads (Miltenyi Biotec). Flow cytometry confirmed  $\geq 95\%$  depletion of the CD4<sup>+</sup> or CD8<sup>+</sup> T-cell populations.

**In Vitro Stimulation of Peritoneal Macrophages and Human Embryonic Kidney (HEK293) Cells.** Mouse peritoneal macrophages were obtained by i.p. injection of 3% (wt/vol) Brewer thioglycollate medium as described previously (4). Isolated cells were plated into 24-well plates at a density of  $5 \times 10^6$  cells per well in a volume of 500  $\mu$ L (DMEM F-12, 10% FBS) for 4 h, followed by the addition of 50  $\mu$ L of stimulants premixed with aluminum hydroxide at final concentration of 1.2 mg/mL. Supernatants were collected after 12–16 h of incubation at 37 °C and subjected to cytokine analysis using TNF- $\alpha$ , IL-12, IL-23, and IL-1 $\beta$  ELISA kits (R&D Systems). HEK293 cells with or without stable human TLR2 transfection were maintained in DMEM supplemented with 10% FBS and 10  $\mu$ g/mL ciprofloxacin. Stimulation of HEK293 cells was performed for 18 h, after which supernatants were collected and assayed for IL-8 concentration (R&D Systems).

**In Vitro Killing Assays.** In vitro killing of Vi-expressing *Salmonella typhimurium* strains was performed as described previously (5). In brief, the *S. typhimurium* C5 (non-Vi PS-expressing) or C5.507 (Vi-expressing) strain was grown to log phase and then

frozen in LB/10% glycerol at  $-80$  °C. HL-60 cells were differentiated by incubation with 100 mM N, N-dimethylformamide (DMSF) for 5 d. On the day of the experiment, bacteria were thawed and then washed twice with PBS. Opsonization of bacteria was performed by incubating  $3 \times 10^4$  CFU with a 1: 10 dilution of serum in a total volume of 30  $\mu$ L for 20 min at room temperature, followed by the addition of  $3 \times 10^6$  differentiated HL-60 cells in a total final volume of 300  $\mu$ L. Samples were incubated at 37 °C on a rotator, and the number of viable bacteria was measured after 60, 120, and 180 min of incubation by serial dilution on LB agar plates.

Opsonophagocytic killing of serotype-1 (strain 101), -5 (strain 501), or -14 (strain 1401) pneumococcus was performed using a standard protocol (6), with serum pooled from mice ( $n = 10$ ) that had received two immunizations of adjuvant alone, PCV13 (200  $\mu$ L per immunization), or multiple antigen-presenting system (MAPS) complex. Opsonophagocytic activity was defined as the serum dilution at which 50% of input bacteria were killed in an opsonophagocytic killing assay (OPA).

- Roe JH (1955) The determination of sugar in blood and spinal fluid with anthrone reagent. *J Biol Chem* 212(1):335–343.
- Lu YJ, et al. (2012) A bivalent vaccine to protect against *Streptococcus pneumoniae* and *Salmonella typhi*. *Vaccine* 30(23):3405–3412.
- Lu YJ, et al. (2008) Interleukin-17A mediates acquired immunity to pneumococcal colonization. *PLoS Pathog* 4(9):e1000159.
- Ray A, Dittel BN (2010) Isolation of mouse peritoneal cavity cells. *J Vis Exp* 35:e1488, doi:10.3791/1488.
- Hale C, et al. (2006) Evaluation of a novel Vi conjugate vaccine in a murine model of salmonellosis. *Vaccine* 24(20):4312–4320.
- Burton RL, Nahm MH (2006) Development and validation of a fourfold multiplexed opsonization assay (MOPA4) for pneumococcal antibodies. *Clin Vaccine Immunol* 13(9): 1004–1009.

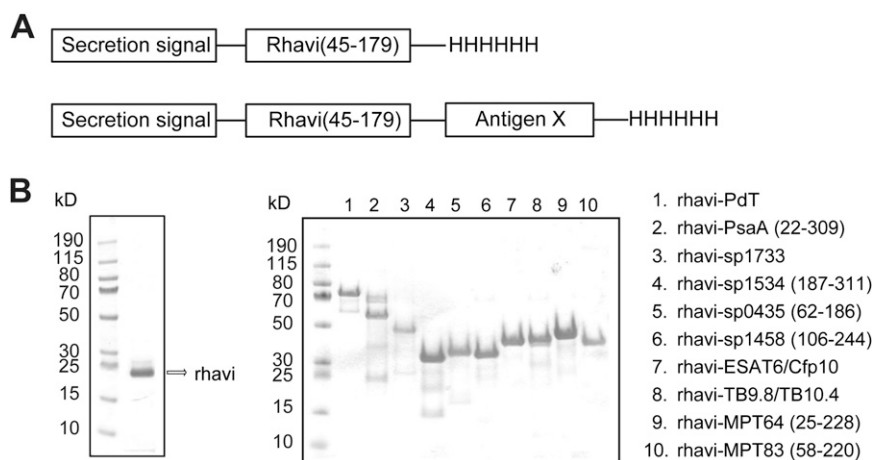

**Fig. S1.** Recombinant rhavi and rhavi fusion antigens. (A) Construction of recombinant rhavi (Upper) and rhavi fusion antigens (Lower). An N-terminal truncated fragment of rhavi (aa 45–179) was used in all constructs. A secretion signal sequence (consisting of MKKIWLALAGLVAFSASA) was introduced to the N terminus of rhavi (aa 45–179). In all fusion proteins, a flexible linker (consisting of GGGGSSSS) was used between the rhavi moiety and the target antigens. (B) SDS/PAGE of purified rhavi (Left) and rhavi fusion antigens (Right).





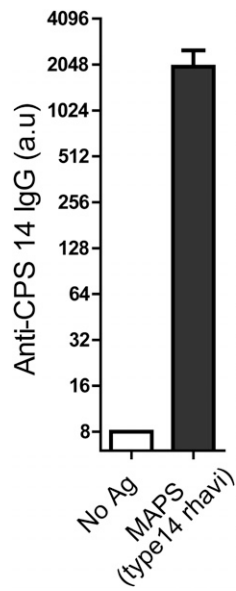

**Fig. 57.** Immunization of mice with a MAPS complex consisting of biotinylated CPS14 and the rhavi protein induces robust anti-CPS14 IgG responses. Mice ( $n = 10$  per group) received three s.c. immunizations with adjuvant alone (no Ag) or with MAPS complexes formed with CPS14 and the rhavi protein (type 14 rhavi,  $1.5 \mu\text{g}$  of PS per dose). Serum anti-CPS14 IgG titers after three immunizations were measured by ELISA.

**A**

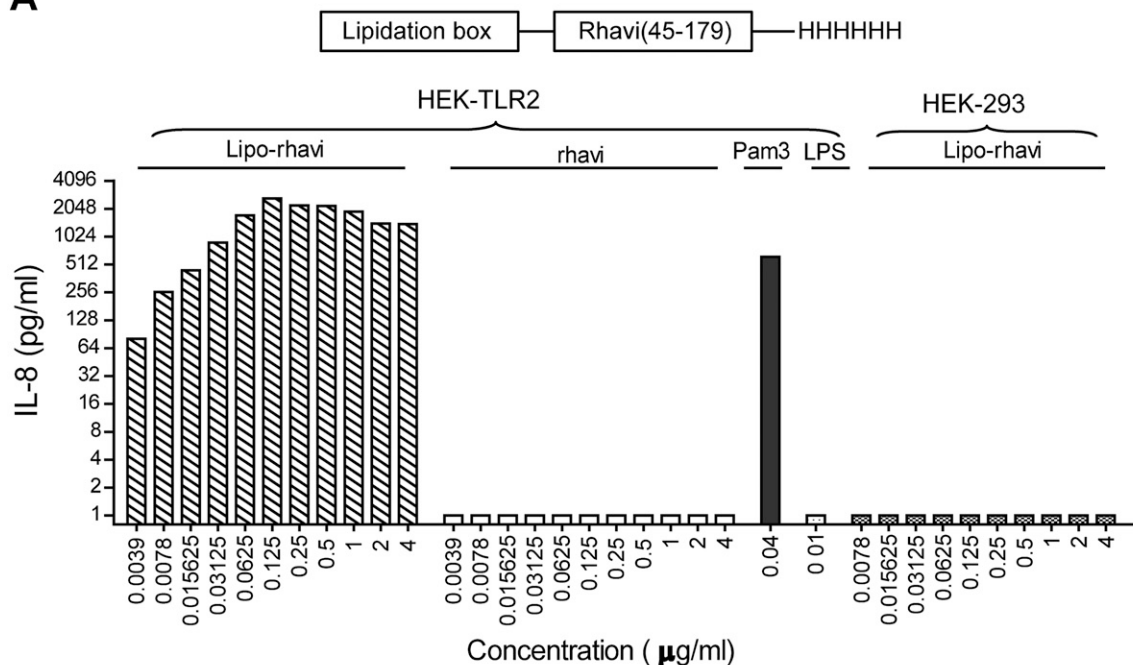

**B**

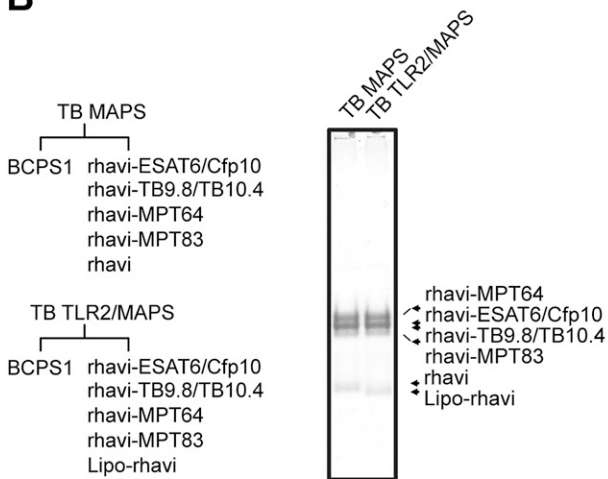

**C**

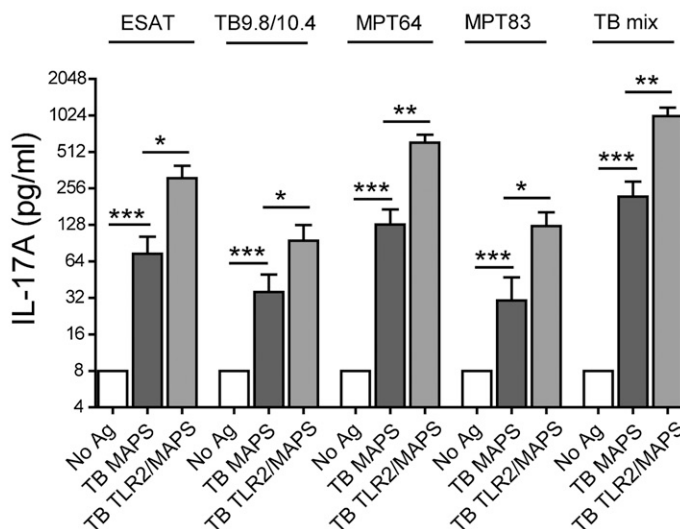

**Fig. 58.** TLR2 activity enhances T-cell immunogenicity of MAPS constructs. (A) MAPS constructs were prepared with biotinylated CPS1 (BCPS1) and either a lipidated (Lipo-rhavi) or nonlipidated rhavi (rhavi) and used to stimulate HEK cells that express (HEK-TLR2) or do not express (HEK-293) TLR2. The Lipo-rhavi MAPS potentially activated HEK-TLR2 cells, but not HEK-293 cells, whereas the rhavi MAPS did not activate either type of HEK cells. Pam<sub>3</sub>Cysk<sub>4</sub> (Pam3, a synthetic TLR2 agonist) and LPS (a TLR4 agonist) served as controls. (B) *Mycobacterium tuberculosis* (TB) MAPS constructs were created by combining BCPS1 with fusion proteins of rhavi and TB antigens, as well as rhavi (TB MAPS) or lipo-rhavi (TB TLR2/MAPS). SDS/PAGE of the two MAPS constructs confirmed similar protein content in all constructs. (C) Mice were immunized three times with either of the two TB MAPS constructs and aluminum hydroxide. At 2 wk after the last immunization, blood samples were obtained and stimulated with the four TB proteins individually or as a mixture (TB mix). Six days later, supernatants were collected and assayed for IL-17A concentration by ELISA. In all cases, the presence of lipo-rhavi was associated with significantly higher IL-17A responses. Bars represent mean  $\pm$  SEM. \* $P < 0.05$ ; \*\* $P < 0.001$ ; \*\*\* $P < 0.0001$ .
